# Supplementary material for: Maternal Hypertensive Disorder in Pregnancy and Childhood Strabismus in Offspring
Source: PubMed Central journal article supplement (PMC11265127; doi:10.1001/jamanetworkopen.2024.23946), 2024-07-22
Supplement: jamanetwopen-e2423946-s002.pdf [file jamanetwopen-e2423946-s002.pdf]

\*First name, last name, and suffix (if applicable) are required and will appear in PubMed.

| <b>*Group Name(s): The China National Birth Cohort Study Group</b> |                   |                              |                         |                            |                                                 |                                                                |                                                                                                   |
|--------------------------------------------------------------------|-------------------|------------------------------|-------------------------|----------------------------|-------------------------------------------------|----------------------------------------------------------------|---------------------------------------------------------------------------------------------------|
| <b>*First Name and Middle Initial(s)</b>                           | <b>*Last Name</b> | <b>*Suffix (eg, Jr, III)</b> | <b>Academic Degrees</b> | <b>Institution</b>         | <b>Location (city, state/province, country)</b> | <b>Role or Contribution, eg, chair, principal investigator</b> | <b>Group (if more than 1 Group listed in the byline and/or Subgroup (eg, Steering Committee))</b> |
| Hongbing                                                           | Shen              |                              | MD,PhD                  | Nanjing Medical University | Nanjing, Jiangsu, China                         |                                                                |                                                                                                   |
| Yankai                                                             | Xia               |                              | MD,PhD                  | Nanjing Medical University | Nanjing, Jiangsu, China                         |                                                                |                                                                                                   |
| Jiong                                                              | Li                |                              | MD,PhD                  | Nanjing Medical University | Nanjing, Jiangsu, China                         |                                                                |                                                                                                   |
| Chuncheng                                                          | Lu                |                              | MD,PhD                  | Nanjing Medical University | Nanjing, Jiangsu, China                         |                                                                |                                                                                                   |
| Yang                                                               | Zhao              |                              | MD,PhD                  | Nanjing Medical University | Nanjing, Jiangsu, China                         |                                                                |                                                                                                   |
| Wei                                                                | Wu                |                              | MD,PhD                  | Nanjing Medical University | Nanjing, Jiangsu, China                         |                                                                |                                                                                                   |
| Minjian                                                            | Chen              |                              | MD,PhD                  | Nanjing Medical University | Nanjing, Jiangsu, China                         |                                                                |                                                                                                   |
| Shanshan                                                           | Geng              |                              | MD,PhD                  | Nanjing Medical University | Nanjing, Jiangsu, China                         |                                                                |                                                                                                   |
| Ye                                                                 | Ding              |                              | MD,PhD                  | Nanjing Medical University | Nanjing, Jiangsu, China                         |                                                                |                                                                                                   |
| Lei                                                                | Huang             |                              | MD,PhD                  | Nanjing Medical University | Nanjing, Jiangsu, China                         |                                                                |                                                                                                   |
| Shiyao                                                             | Tao               |                              | MD,PhD                  | Nanjing Medical University | Nanjing, Jiangsu, China                         |                                                                |                                                                                                   |
| Yuanyan                                                            | Dou               |                              | MD,PhD                  | Nanjing Medical University | Nanjing, Jiangsu, China                         |                                                                |                                                                                                   |
| Shuifang                                                           | Lei               |                              | MD,PhD                  | Nanjing Medical University | Nanjing, Jiangsu, China                         |                                                                |                                                                                                   |
| Kang                                                               | Ke                |                              | MD,PhD                  | Nanjing Medical University | Nanjing, Jiangsu, China                         |                                                                |                                                                                                   |
| Yanjie                                                             | Zhang             |                              | MD,PhD                  | Nanjing Medical University | Nanjing, Jiangsu, China                         |                                                                |                                                                                                   |
| Yiqun                                                              | Xu                |                              | MD,PhD                  | Nanjing Medical University | Nanjing, Jiangsu, China                         |                                                                |                                                                                                   |
| Jinghan                                                            | Wang              |                              | MD,PhD                  | Nanjing Medical University | Nanjing, Jiangsu, China                         |                                                                |                                                                                                   |
| Xianxian                                                           | Zhu               |                              | MD                      | Nanjing Medical University | Nanjing, Jiangsu, China                         |                                                                |                                                                                                   |
| Huixin                                                             | Xue               |                              | MD                      | Nanjing Medical University | Nanjing, Jiangsu, China                         |                                                                |                                                                                                   |
| Ming                                                               | Gan               |                              | MD                      | Nanjing Medical University | Nanjing, Jiangsu, China                         |                                                                |                                                                                                   |
| Shuxin                                                             | Xiao              |                              | MD                      | Nanjing Medical University | Nanjing, Jiangsu, China                         |                                                                |                                                                                                   |
| Weiting                                                            | Wang              |                              | MD                      | Nanjing Medical University | Nanjing, Jiangsu, China                         |                                                                |                                                                                                   |
| Di                                                                 | Pi                |                              | MD                      | Nanjing Medical University | Nanjing, Jiangsu, China                         |                                                                |                                                                                                   |
| Chang                                                              | Wang              |                              | MD                      | Nanjing Medical University | Nanjing, Jiangsu, China                         |                                                                |                                                                                                   |
| Haowen                                                             | Zhang             |                              | MD                      | Nanjing Medical University | Nanjing, Jiangsu, China                         |                                                                |                                                                                                   |
| Bo                                                                 | Yang              |                              | MD                      | Nanjing Medical University | Nanjing, Jiangsu, China                         |                                                                |                                                                                                   |
| Yufan                                                              | Jin               |                              | MD                      | Nanjing Medical University | Nanjing, Jiangsu, China                         |                                                                |                                                                                                   |
| Xiao                                                               | Zhang             |                              | MD                      | Nanjing Medical University | Nanjing, Jiangsu, China                         |                                                                |                                                                                                   |
| Yongbin                                                            | Xiong             |                              | MD                      | Nanjing Medical University | Nanjing, Jiangsu, China                         |                                                                |                                                                                                   |
| Xin                                                                | Zou               |                              | MD                      | Nanjing Medical University | Nanjing, Jiangsu, China                         |                                                                |                                                                                                   |

## Supplemental Online Content: Nonauthor Collaborators

\*First name, last name, and suffix (if applicable) are required and will appear in PubMed.

| *First Name and Middle Initial(s) | *Last Name | *Suffix (eg, Jr, III) | Academic Degrees | Institution                                                                      | Location (city, state/province, country) | Role or Contribution, eg, chair, principal investigator | Group (if more than 1 Group listed in the byline) and/or Subgroup (eg, Steering Committee) |
|-----------------------------------|------------|-----------------------|------------------|----------------------------------------------------------------------------------|------------------------------------------|---------------------------------------------------------|--------------------------------------------------------------------------------------------|
| Zheng                             | Yong       |                       | MD               | Nanjing Medical University                                                       | Nanjing, Jiangsu, China                  |                                                         |                                                                                            |
| Shuting                           | Wu         |                       | MD               | Nanjing Medical University                                                       | Nanjing, Jiangsu, China                  |                                                         |                                                                                            |
| Yue                               | Qu         |                       | MD               | Nanjing Medical University                                                       | Nanjing, Jiangsu, China                  |                                                         |                                                                                            |
| Qin                               | Wang       |                       | MD               | Nanjing Medical University                                                       | Nanjing, Jiangsu, China                  |                                                         |                                                                                            |
| Jie                               | Chen       |                       | MD               | Nanjing Medical University                                                       | Nanjing, Jiangsu, China                  |                                                         |                                                                                            |
| Ganchong                          | Liao       |                       | MD               | Nanjing Medical University                                                       | Nanjing, Jiangsu, China                  |                                                         |                                                                                            |
| Liya                              | Pang       |                       | MD               | Nanjing Medical University                                                       | Nanjing, Jiangsu, China                  |                                                         |                                                                                            |
| Dan                               | Huang      |                       | Ph.D             | The First Affiliated Hospital with Nanjing Medical University                    | Nanjing, Jiangsu, China                  |                                                         |                                                                                            |
| Zhujun                            | Fu         |                       | Ph.D             | Children's Hospital of Nanjing Medical University                                | Nanjing, Jiangsu, China                  |                                                         |                                                                                            |
| Zijin                             | Wang       |                       | Ph.D             | The First Affiliated Hospital with Nanjing Medical University                    | Nanjing, Jiangsu, China                  |                                                         |                                                                                            |
| Yue                               | Wang       |                       | Ph.D             | Nanjing First Hospital with Nanjing Medical University                           | Nanjing, Jiangsu, China                  |                                                         |                                                                                            |
| Rui                               | Li         |                       | Ph.D             | Nanjing First Hospital with Nanjing Medical University                           | Nanjing, Jiangsu, China                  |                                                         |                                                                                            |
| Haohai                            | Tong       |                       | M.M.             | The Second Affiliated Hospital with Zhejiang University School of Medicine       | Hangzhou, Zhejiang, China                |                                                         |                                                                                            |
| Shu                               | Han        |                       | M.M.             | Children's Hospital of Soochow University                                        | Suzhou, Jiangsu, China                   |                                                         |                                                                                            |
| Xiaoyan                           | Zhao       |                       | M.M.             | Changzhou NO.2 People's Hospital with Nanjing Medical University                 | Changzhou, Jiangsu, China                |                                                         |                                                                                            |
| Shiya                             | Shen       |                       | M.M.             | The First Affiliated Hospital with Nanjing Medical University                    | Nanjing, Jiangsu, China                  |                                                         |                                                                                            |
| Yun                               | Wang       |                       | M.M.             | Woman's Hospital of Nanjing Medical University                                   | Nanjing, Jiangsu, China                  |                                                         |                                                                                            |
| Wen                               | Yan        |                       | M.M.             | Yancheng First Hospital Affiliated Hospital of Nanjing University Medical School | Yancheng, Jiangsu, China                 |                                                         |                                                                                            |

## Supplemental Online Content: Nonauthor Collaborators

\*First name, last name, and suffix (if applicable) are required and will appear in PubMed.

| *First Name and Middle Initial(s) | *Last Name | *Suffix (eg, Jr, III) | Academic Degrees | Institution                                                     | Location (city, state/province, country) | Role or Contribution, eg, chair, principal investigator | Group (if more than 1 Group listed in the byline) and/or Subgroup (eg, Steering Committee) |
|-----------------------------------|------------|-----------------------|------------------|-----------------------------------------------------------------|------------------------------------------|---------------------------------------------------------|--------------------------------------------------------------------------------------------|
| Xiaoxiao                          | Li         |                       | M.M.             | Children's Hospital of Soochow University                       | Suzhou, Jiangsu, China                   |                                                         |                                                                                            |
| Andi                              | Zhao       |                       | Ph.D             | The First Affiliated Hospital with Nanjing Medical University   | Nanjing, Jiangsu, China                  |                                                         |                                                                                            |
| Danni                             | Chen       |                       | M.M.             | Children's Hospital with Nanjing Medical University             | Nanjing, Jiangsu, China                  |                                                         |                                                                                            |
| Lei                               | Liu        |                       | M.M.             | Jiangsu College Of Nursing                                      | Huaian, Jiangsu, China                   |                                                         |                                                                                            |
| Wei                               | Guo        |                       | Ph.D             | The First Affiliated Hospital with Nanjing Medical University   | Nanjing, Jiangsu, China                  |                                                         |                                                                                            |
| Yingxiao                          | Qian       |                       | M.M.             | Changzhou Health Vocational Technology College                  | Changzhou, Jiangsu, China                |                                                         |                                                                                            |
| Lei                               | Hua        |                       | M.M.             | Eastern Theater General Hospital, Qinhuai District Medical Area | Nanjing, Jiangsu, China                  |                                                         |                                                                                            |
| Qi                                | Yan        |                       | M.M.             | The First Affiliated Hospital with Nanjing Medical University   | Nanjing, Jiangsu, China                  |                                                         |                                                                                            |
| Xiaoxia                           | Zuo        |                       | M.M.             | The First Affiliated Hospital with Nanjing Medical University   | Nanjing, Jiangsu, China                  |                                                         |                                                                                            |
| Tong                              | Zhang      |                       | M.M.             | The First Affiliated Hospital with Nanjing Medical University   | Nanjing, Jiangsu, China                  |                                                         |                                                                                            |
| Ziyi                              | Ni         |                       | M.M.             | The First Affiliated Hospital with Nanjing Medical University   | Nanjing, Jiangsu, China                  |                                                         |                                                                                            |
| Yu                                | Jing       |                       | M.M.             | The First Affiliated Hospital with Nanjing Medical University   | Nanjing, Jiangsu, China                  |                                                         |                                                                                            |
| Tiantian                          | Zhou       |                       | M.M.             | The First Affiliated Hospital with Nanjing Medical University   | Nanjing, Jiangsu, China                  |                                                         |                                                                                            |
| Xiaoqi                            | Zhu        |                       | M.M.             | The First Affiliated Hospital with Nanjing Medical University   | Nanjing, Jiangsu, China                  |                                                         |                                                                                            |
| Chenyu                            | Zhou       |                       | M.M.             | The First Affiliated Hospital with Nanjing Medical University   | Nanjing, Jiangsu, China                  |                                                         |                                                                                            |
| Yuting                            | Zhang      |                       | B.M.             | Nanjing Medical University                                      | Nanjing, Jiangsu, China                  |                                                         |                                                                                            |

## Supplemental Online Content: Nonauthor Collaborators

\*First name, last name, and suffix (if applicable) are required and will appear in PubMed.

| *First Name and Middle Initial(s) | *Last Name | *Suffix (eg, Jr, III) | Academic Degrees | Institution                                                   | Location (city, state/province, country) | Role or Contribution, eg, chair, principal investigator | Group (if more than 1 Group listed in the byline) and/or Subgroup (eg, Steering Committee) |
|-----------------------------------|------------|-----------------------|------------------|---------------------------------------------------------------|------------------------------------------|---------------------------------------------------------|--------------------------------------------------------------------------------------------|
| Yunfan                            | Shi        |                       | B.M.             | The First Affiliated Hospital with Nanjing Medical University | Nanjing, Jiangsu, China                  |                                                         |                                                                                            |
| Yuhong                            | Feng       |                       | B.M.             | The First Affiliated Hospital with Nanjing Medical University | Nanjing, Jiangsu, China                  |                                                         |                                                                                            |
| Chuxuan                           | Zhang      |                       | B.M.             | The First Affiliated Hospital with Nanjing Medical University | Nanjing, Jiangsu, China                  |                                                         |                                                                                            |
| Haodong                           | Chi        |                       | B.M.             | Nanjing Medical University                                    | Nanjing, Jiangsu, China                  |                                                         |                                                                                            |
| Fanbo                             | Sun        |                       | B.M.             | Nanjing Medical University                                    | Nanjing, Jiangsu, China                  |                                                         |                                                                                            |
| Jian                              | Cui        |                       | B.M.             | Nanjing Medical University                                    | Nanjing, Jiangsu, China                  |                                                         |                                                                                            |
| Yan                               | Gao        |                       | B.M.             | Nanjing Medical University                                    | Nanjing, Jiangsu, China                  |                                                         |                                                                                            |
| Xinyuan                           | Yao        |                       | B.M.             | Nanjing Medical University                                    | Nanjing, Jiangsu, China                  |                                                         |                                                                                            |
| Meng                              | Li         |                       | B.M.             | Nanjing Medical University                                    | Nanjing, Jiangsu, China                  |                                                         |                                                                                            |
| Jiahao                            | Si         |                       | B.M.             | Nanjing Medical University                                    | Nanjing, Jiangsu, China                  |                                                         |                                                                                            |
| Shasha                            | Xu         |                       | B.M.             | Nanjing Medical University                                    | Nanjing, Jiangsu, China                  |                                                         |                                                                                            |
| Xi                                | Chen       |                       | B.M.             | Nanjing Medical University                                    | Nanjing, Jiangsu, China                  |                                                         |                                                                                            |
| Jiyu                              | Zhang      |                       | B.M.             | Nanjing Medical University                                    | Nanjing, Jiangsu, China                  |                                                         |                                                                                            |
| Xinyu                             | Zheng      |                       | B.M.             | Nanjing Medical University                                    | Nanjing, Jiangsu, China                  |                                                         |                                                                                            |
| Yelongzi                          | Cao        |                       | B.M.             | Nanjing Medical University                                    | Nanjing, Jiangsu, China                  |                                                         |                                                                                            |
| Xiaodong                          | Shao       |                       | B.M.             | Nanjing Medical University                                    | Nanjing, Jiangsu, China                  |                                                         |                                                                                            |
| Shuning                           | Liu        |                       | B.M.             | Nanjing Medical University                                    | Nanjing, Jiangsu, China                  |                                                         |                                                                                            |
| Yuxi                              | Chen       |                       | B.M.             | Nanjing Medical University                                    | Nanjing, Jiangsu, China                  |                                                         |                                                                                            |
| Qin                               | Shu        |                       | B.M.             | Nanjing Medical University                                    | Nanjing, Jiangsu, China                  |                                                         |                                                                                            |
| Shiding                           | Li         |                       | B.M.             | Nanjing Medical University                                    | Nanjing, Jiangsu, China                  |                                                         |                                                                                            |
| Jingsong                          | Dang       |                       | B.M.             | Nanjing Medical University                                    | Nanjing, Jiangsu, China                  |                                                         |                                                                                            |
| Tao                               | Zhang      |                       | B.M.             | Nanjing Medical University                                    | Nanjing, Jiangsu, China                  |                                                         |                                                                                            |
| Ranran                            | Ding       |                       | B.M.             | Nanjing Medical University                                    | Nanjing, Jiangsu, China                  |                                                         |                                                                                            |
| Yuemin                            | Wu         |                       | B.M.             | Nanjing Medical University                                    | Nanjing, Jiangsu, China                  |                                                         |                                                                                            |
| Liyuan                            | Wang       |                       | B.M.             | Nanjing Medical University                                    | Nanjing, Jiangsu, China                  |                                                         |                                                                                            |
| Ningjing                          | Zhao       |                       | B.M.             | Nanjing Medical University                                    | Nanjing, Jiangsu, China                  |                                                         |                                                                                            |
| Jiajia                            | Yang       |                       | B.M.             | Nanjing Medical University                                    | Nanjing, Jiangsu, China                  |                                                         |                                                                                            |
| Shuoyang                          | Zhao       |                       | B.M.             | Nanjing Medical University                                    | Nanjing, Jiangsu, China                  |                                                         |                                                                                            |

## Supplemental Online Content: Nonauthor Collaborators

\*First name, last name, and suffix (if applicable) are required and will appear in PubMed.

| *First Name and Middle Initial(s) | *Last Name | *Suffix (eg, Jr, III) | Academic Degrees | Institution                | Location (city, state/province, country) | Role or Contribution, eg, chair, principal investigator | Group (if more than 1 Group listed in the byline) and/or Subgroup (eg, Steering Committee) |
|-----------------------------------|------------|-----------------------|------------------|----------------------------|------------------------------------------|---------------------------------------------------------|--------------------------------------------------------------------------------------------|
| Yichao                            | Qian       |                       | B.M.             | Nanjing Medical University | Nanjing, Jiangsu, China                  |                                                         |                                                                                            |
| Yao                               | Lu         |                       | B.M.             | Nanjing Medical University | Nanjing, Jiangsu, China                  |                                                         |                                                                                            |
| Yue                               | Zhu        |                       | B.M.             | Nanjing Medical University | Nanjing, Jiangsu, China                  |                                                         |                                                                                            |
| Fanfei                            | Ma         |                       | B.M.             | Nanjing Medical University | Nanjing, Jiangsu, China                  |                                                         |                                                                                            |
| Changqin                          | Zhang      |                       | B.M.             | Nanjing Medical University | Nanjing, Jiangsu, China                  |                                                         |                                                                                            |
| Yuxiao                            | Xu         |                       | B.M.             | Nanjing Medical University | Nanjing, Jiangsu, China                  |                                                         |                                                                                            |
| Yan                               | Zhu        |                       | B.M.             | Nanjing Medical University | Nanjing, Jiangsu, China                  |                                                         |                                                                                            |
| Weiyi                             | Dong       |                       | B.M.             | Nanjing Medical University | Nanjing, Jiangsu, China                  |                                                         |                                                                                            |
| Mengqi                            | Dong       |                       | B.M.             | Nanjing Medical University | Nanjing, Jiangsu, China                  |                                                         |                                                                                            |
| Zhitong                           | Li         |                       | B.M.             | Nanjing Medical University | Nanjing, Jiangsu, China                  |                                                         |                                                                                            |
| Jing                              | Sun        |                       | B.M.             | Nanjing Medical University | Nanjing, Jiangsu, China                  |                                                         |                                                                                            |
| Yuxiang                           | Yi         |                       | B.M.             | Nanjing Medical University | Nanjing, Jiangsu, China                  |                                                         |                                                                                            |
| Hongxue                           | Fu         |                       | B.M.             | Nanjing Medical University | Nanjing, Jiangsu, China                  |                                                         |                                                                                            |
| Jie                               | Dou        |                       | B.M.             | Nanjing Medical University | Nanjing, Jiangsu, China                  |                                                         |                                                                                            |
| Wanting                           | Gao        |                       | B.M.             | Nanjing Medical University | Nanjing, Jiangsu, China                  |                                                         |                                                                                            |
| Zhuorong                          | Li         |                       | B.M.             | Nanjing Medical University | Nanjing, Jiangsu, China                  |                                                         |                                                                                            |
| Leyan                             | Sun        |                       | B.M.             | Nanjing Medical University | Nanjing, Jiangsu, China                  |                                                         |                                                                                            |
| Lan                               | Tang       |                       | B.M.             | Nanjing Medical University | Nanjing, Jiangsu, China                  |                                                         |                                                                                            |
| Xinyan                            | Xu         |                       | B.M.             | Nanjing Medical University | Nanjing, Jiangsu, China                  |                                                         |                                                                                            |
| Jingwen                           | Yang       |                       | B.M.             | Nanjing Medical University | Nanjing, Jiangsu, China                  |                                                         |                                                                                            |
| Ping                              | Xue        |                       | B.M.             | Nanjing Medical University | Nanjing, Jiangsu, China                  |                                                         |                                                                                            |
| Shengxiang                        | Huang      |                       | B.M.             | Nanjing Medical University | Nanjing, Jiangsu, China                  |                                                         |                                                                                            |
| Yidan                             | Xia        |                       | B.M.             | Nanjing Medical University | Nanjing, Jiangsu, China                  |                                                         |                                                                                            |
| Sirui                             | Gu         |                       | B.M.             | Nanjing Medical University | Nanjing, Jiangsu, China                  |                                                         |                                                                                            |
| Yaxin                             | Chen       |                       | B.M.             | Nanjing Medical University | Nanjing, Jiangsu, China                  |                                                         |                                                                                            |
| Yizheng                           | Zhang      |                       | B.M.             | Nanjing Medical University | Nanjing, Jiangsu, China                  |                                                         |                                                                                            |
| Qi                                | Chen       |                       | B.M.             | Nanjing Medical University | Nanjing, Jiangsu, China                  |                                                         |                                                                                            |
| Ruize                             | Wu         |                       | B.M.             | Nanjing Medical University | Nanjing, Jiangsu, China                  |                                                         |                                                                                            |
| Anqi                              | Shi        |                       | B.M.             | Nanjing Medical University | Nanjing, Jiangsu, China                  |                                                         |                                                                                            |
| Yujie                             | Jiang      |                       | B.M.             | Nanjing Medical University | Nanjing, Jiangsu, China                  |                                                         |                                                                                            |
| Rui                               | Xu         |                       | B.M.             | Nanjing Medical University | Nanjing, Jiangsu, China                  |                                                         |                                                                                            |

## Supplemental Online Content: Nonauthor Collaborators

\*First name, last name, and suffix (if applicable) are required and will appear in PubMed.

| *First Name and Middle Initial(s) | *Last Name | *Suffix (eg, Jr, III) | Academic Degrees | Institution                                               | Location (city, state/province, country) | Role or Contribution, eg, chair, principal investigator | Group (if more than 1 Group listed in the byline) and/or Subgroup (eg, Steering Committee) |
|-----------------------------------|------------|-----------------------|------------------|-----------------------------------------------------------|------------------------------------------|---------------------------------------------------------|--------------------------------------------------------------------------------------------|
| Linting                           | Mei        |                       | B.M.             | Nanjing Medical University                                | Nanjing, Jiangsu, China                  |                                                         |                                                                                            |
| Xuexian                           | Zhu        |                       | B.M.             | Nanjing Medical University                                | Nanjing, Jiangsu, China                  |                                                         |                                                                                            |
| Yiting                            | Wang       |                       | B.M.             | Nanjing Medical University                                | Nanjing, Jiangsu, China                  |                                                         |                                                                                            |
| Xianyue                           | Liang      |                       | B.M.             | Nanjing Medical University                                | Nanjing, Jiangsu, China                  |                                                         |                                                                                            |
| Jing                              | Xu         |                       | B.M.             | Nanjing Medical University                                | Nanjing, Jiangsu, China                  |                                                         |                                                                                            |
| Zheng                             | Zhang      |                       | B.M.             | Nanjing Medical University                                | Nanjing, Jiangsu, China                  |                                                         |                                                                                            |
| Chengfei                          | Xu         |                       | B.M.             | Nanjing Medical University                                | Nanjing, Jiangsu, China                  |                                                         |                                                                                            |
| Jin                               | Liu        |                       | B.M.             | Nanjing Medical University                                | Nanjing, Jiangsu, China                  |                                                         |                                                                                            |
| Yucao                             | Wang       |                       | B.M.             | Nanjing Medical University                                | Nanjing, Jiangsu, China                  |                                                         |                                                                                            |
| Jinghan                           | Liang      |                       | B.M.             | Nanjing Medical University                                | Nanjing, Jiangsu, China                  |                                                         |                                                                                            |
| Jiaxu                             | Li         |                       | B.M.             | Nanjing Medical University                                | Nanjing, Jiangsu, China                  |                                                         |                                                                                            |
| Junyi                             | You        |                       | B.M.             | Nanjing Medical University                                | Nanjing, Jiangsu, China                  |                                                         |                                                                                            |
| Zhiying                           | Lin        |                       | B.M.             | Nanjing Medical University                                | Nanjing, Jiangsu, China                  |                                                         |                                                                                            |
| Wenjie                            | Zhou       |                       | B.M.             | Nanjing Medical University                                | Nanjing, Jiangsu, China                  |                                                         |                                                                                            |
| Zihan                             | Yin        |                       | B.M.             | Nanjing Medical University                                | Nanjing, Jiangsu, China                  |                                                         |                                                                                            |
| Cheng                             | Sun        |                       | B.M.             | Nanjing Medical University                                | Nanjing, Jiangsu, China                  |                                                         |                                                                                            |
| Difei                             | Zuo        |                       | B.M.             | Nanjing Medical University                                | Nanjing, Jiangsu, China                  |                                                         |                                                                                            |
| Ruini                             | Zhu        |                       | B.M.             | Nanjing Medical University                                | Nanjing, Jiangsu, China                  |                                                         |                                                                                            |
| Qikun                             | Deng       |                       | B.M.             | Nanjing Medical University                                | Nanjing, Jiangsu, China                  |                                                         |                                                                                            |
| Yujiao                            | Shi        |                       | B.M.             | Nanjing Medical University                                | Nanjing, Jiangsu, China                  |                                                         |                                                                                            |
| Yujie                             | Wang       |                       | B.M.             | Nanjing Medical University                                | Nanjing, Jiangsu, China                  |                                                         |                                                                                            |
| Zhen                              | Wang       |                       | B.M.             | Nanjing Drum Tower Eye Clinic of Children and Adolescents | Nanjing, Jiangsu, China                  |                                                         |                                                                                            |
| Xiaoyu                            | Fan        |                       | B.M.             | Nanjing Drum Tower Eye Clinic of Children and Adolescents | Nanjing, Jiangsu, China                  |                                                         |                                                                                            |
| Xinying                           | Li         |                       | B.M.             | Nanjing Drum Tower Eye Clinic of Children and Adolescents | Nanjing, Jiangsu, China                  |                                                         |                                                                                            |
