# Supplementary material for: Maternal Hypertensive Disorder in Pregnancy and Childhood Strabismus in Offspring
Source: PubMed Central journal article supplement (PMC11265127; doi:10.1001/jamanetworkopen.2024.23946), 2024-07-22
Supplement: jamanetwopen-e2423946-s003.pdf [file jamanetwopen-e2423946-s003.pdf]

## **Data Sharing Statement**

Zhu. Maternal Hypertensive Disorder in Pregnancy and Childhood Strabismus in Offspring.  
*JAMA Netw Open*. Published July 22, 2024. doi:10.1001/jamanetworkopen.2024.23946

### **Data**

**Data available:** No
